1 Transcriptome analysis reveals that fertilization with cryopreserved sperm  
2 downregulates genes relevant for early embryo development in the horse

3

4 Ortiz- Rodriguez JM, Ortega Ferrusola C, Gil MC, Martín Cano FE, Gaitskell-Phillips  
5 G, Rodríguez-Martínez H, Hinrichs K<sup>1</sup>, Álvarez-Barrientos A<sup>3</sup>, Román A<sup>2</sup>, Peña FJ\*

6

7 Laboratory of Equine Reproduction and Equine Spermatology, Veterinary Teaching  
8 Hospital, University of Extremadura, Cáceres, Spain.

9 <sup>1</sup>Department of Veterinary Physiology and Pharmacology, College of Veterinary

10 Medicine & Biomedical Sciences, Texas A&M University, College Station, Texas.

11 <sup>2</sup>Department of Biochemistry and Molecular Biology, University of Extremadura,  
12 Badajoz, Spain

13 <sup>3</sup>STAB, University of Extremadura, Badajoz, Spain

14 \*Correspondence to Dr. FJ Peña, Veterinary Teaching Hospital, Laboratory of Equine  
15 Spermatology and Reproduction, Faculty of Veterinary Medicine University of

16 Extremadura Avd de la Universidad s/n 10003 Cáceres Spain. E-mail  
17 [fjuanpvega@unex.es](mailto:fjuanpvega@unex.es)

18 phone + 34 927-257167

19 fax +34 927257102

20

21

## 22 **Acknowledgements**

23

24 The authors received financial support for this study from the Ministerio de Economía y  
25 Competitividad-FEDER, Madrid, Spain, grant [AGL2017-83149-R](#). Junta de  
26 Extremadura-FEDER (IB16030 and GR18008) and the The Swedish Research councils  
27 VR,(Grant 521-2011-6553) and FORMAS (Grant 2017-00946), Stockholm. JMOR  
28 holds a Predoctoral grant from the Valhondo Calaaf Foundation, Cáceres, Spain

29

30

31

32

33

34

35 **ABSTRACT**

36

37 Artificial insemination with cryopreserved sperm is a major assisted reproductive  
38 technology in many species. In horses, as in humans, insemination with cryopreserved  
39 sperm is associated with lower pregnancy rates than those for fresh sperm, however,  
40 direct effects of sperm cryopreservation on the development of resulting embryos are  
41 largely unexplored. The aim of this study was to investigate differences in gene  
42 expression between embryos resulting from fertilization with fresh or cryopreserved  
43 sperm. Embryos were obtained at 8, 10 or 12 days after ovulation from mares  
44 inseminated post-ovulation on successive cycles with either fresh sperm or frozen-  
45 thawed sperm from the same stallion, providing matched embryo pairs at each day.  
46 RNA was isolated from two matched pairs (4 embryos) for each day, and cDNA  
47 libraries were built and sequenced. Significant differences in transcripts per kilobase  
48 million (TPM) were determined using (i) genes for which the expression difference  
49 between treatments was higher than 99% of that in the random case ( $P < 0.01$ ), and (ii)  
50 genes for which the fold change was  $\geq 2$ , to avoid expression bias in selection of the  
51 candidate genes. Molecular pathways were explored using the DAVID webserver,  
52 followed by network analyses using STRING, with a threshold of 0.700 for positive  
53 interactions. The transcriptional profile of embryos obtained with frozen-thawed sperm  
54 differed significantly from that for embryos derived from fresh sperm on all days,  
55 showing significant down-regulation of genes involved in biological pathways related to  
56 oxidative phosphorylation, DNA binding, DNA replication, and immune response.  
57 Many genes with reduced expression were orthologs of genes known to be embryonic  
58 lethal in mice. This study, for the first time, provides evidence of altered transcription in  
59 embryos resulting from fertilization with cryopreserved spermatozoa in any species. As  
60 sperm cryopreservation is commonly used in many species, including human, the effect  
61 of this intervention on expression of developmentally important genes in resulting  
62 embryos warrants attention.

63

64 **Key words:** equine, sperm, cryopreservation, embryo, RNAseq, transcriptome

65

## 67 INTRODUCTION

68

69 Cryopreservation is a common procedure in assisted reproductive technology, in both  
70 humans and the animal breeding industry [1-3]. Cryopreserved sperm are routinely used  
71 for artificial insemination (AI), in vitro fertilization (IVF) and intracytoplasmic sperm  
72 injection (ICSI). However, it is clear that sperm cryopreservation methods are currently  
73 sub-optimal, as pregnancy rates with cryopreserved sperm are lower than those with  
74 fresh sperm in humans and horses [4], among other species. Cryopreservation leads to  
75 extensive damage of sperm cell membranes and causes metabolic and functional  
76 alteration of sperm [5, 6], particularly of their mitochondria [7-9]. Cryopreservation  
77 may alter sperm DNA [10]; recently, specific cryodamage to sperm genes and  
78 transcripts have been reported [11, 12], even in samples with good sperm motility post  
79 thaw and in the absence of detectable DNA fragmentation. The sperm DNA is  
80 epigenetically programmed to regulate embryonic gene expression, and changes to this  
81 epigenome cause developmental dysregulation [13]. Cryopreservation has been found to  
82 significantly change the sperm DNA methylome, as well as to alter expression of  
83 epigenetic-related genes such as methyltransferases (Aurich, Zang). Cryopreservation of  
84 sperm imposes oxidative stress and redox deregulation in spermatozoa, leading to the  
85 presence of toxic adduct-forming compounds such as 4-hydroxynonenal (4-HNE) in  
86 sperm membranes [14]. Moreover, mitochondria of spermatozoa surviving  
87 cryopreservation show increased production of reactive oxygen species [7, 8, 15].  
88 Signaling pathways crucial to normal embryo development are sensitive to  
89 perturbations of endogenous redox state, and are also susceptible to modulation by  
90 reactive oxygen species [16]. Thus, fertilization by damaged spermatozoa may impact  
91 early embryo development and even have effects that appear later in the life of the  
92 offspring [17].

93 Moreover, appreciation of the contribution of sperm to embryo development has  
94 evolved from the concept that the only role of sperm at fertilization is to introduce the  
95 male genome into the egg. Sperm carry a myriad of small noncoding RNAs with  
96 potential roles in early embryo development [18, 19]. Notably, sperm carry the  
97 activating factor PLC $\zeta$ , which triggers calcium oscillations that induce oocyte activation  
98 [20, 21], and alterations in frequency and amplitude of post-fertilization calcium  
99 oscillations can affect the phenotype of the resulting embryo into adulthood [22]. Thus,

100 there are extensive pathways by which cryopreservation of sperm could alter the  
101 development of the fertilized oocyte and embryo.

102

103 Despite the widespread use of cryopreserved sperm, and the known decrease in  
104 pregnancy rates with its use, little direct information is available on the effect of sperm  
105 cryopreservation on development of the resulting embryo. Recent advances in  
106 transcriptome amplification and next generation sequencing provide the ability to obtain  
107 the full transcriptome of individual embryos [23], thus offering a basis for studies on  
108 differences in gene expression associated with fertilization with cryopreserved sperm. In  
109 the present study, we analyzed the transcriptome of equine embryos produced with fresh  
110 or frozen-thawed sperm, to determine the impact of sperm cryopreservation on gene  
111 expression during early equine embryo development.

112

## 113 **MATERIAL AND METHODS**

114

### 115 **Animals and experimental design**

116

117 Animals were maintained according to European laws and regulations, and all  
118 experimental procedures were reviewed and approved by the Ethical committee of the  
119 University of Extremadura, Cáceres, Spain. Six mares and two stallions of known  
120 fertility were used for this study. Each mare was assigned a day of embryo recovery (8,  
121 10 or 12 days post ovulation) and on successive cycles was assigned to be inseminated  
122 with fresh or frozen-thawed sperm from the same stallion, to provide matched embryo  
123 pairs for that day of embryo development. The mares were treated with a prostaglandin  
124 analogue to shorten the luteal phase and were monitored daily by transrectal  
125 ultrasonography. When a follicle of at least 35 mm diameter was detected in the absence  
126 of luteal tissue, with marked uterine edema and low cervical tone, mares received 2,500  
127 IU of hCG i.v.. The follicle was monitored by transrectal ultrasonography every 6 h  
128 thereafter to detect the time of ovulation. Mares were inseminated immediately once  
129 ovulation was detected, with a minimum of 100 million either fresh sperm or frozen-  
130 thawed sperm, from the same stallion. Embryos were obtained by uterine lavage on the  
131 designated day after ovulation. For each embryo day, two embryos produced with fresh  
132 sperm, designated FRSH embryos, and 2 embryos produced with frozen-thawed sperm,  
133 designated CRYO embryos were obtained. Embryos were snap-frozen in liquid N<sub>2</sub> and

134 stored at  $-80^{\circ}\text{C}$  until analysis. Previous clinical reports indicated that there is no a  
135 significant effect in the rate of embryonic vesicle growth between mares inseminated  
136 with fresh or frozen-thawed sperm if both are inseminated post-ovulation [24].

137

### 138 **Isolation of RNA**

139

140 Total RNA was isolated from the embryos using the PicoPure™ RNA Isolation Kit  
141 (Catalog number KIT0204, ThermoFisher) following the manufacturer's instructions.  
142 RNA concentration and quality were assessed by automatic electrophoresis using 2100  
143 Bioanalyzer (Agilent Technologies, Santa Clara, CA, USA).

144

### 145 **RNA-seq analysis**

146

147 cDNA libraries were built using an IonTorrent S5/XL sequencer (Thermo Fisher  
148 Scientific, Waltham, MA USA). The raw reads were aligned to a horse transcriptome  
149 generated using ENSEMBL (Equ Cab 2 version) in the Torrent server with proprietary  
150 ThermoFisher algorithms. Then, custom scripts were used to transform reads into  
151 transcript counts, and transcripts per kilobase million (TPM) scores for each gene were  
152 retrieved. A gene was considered expressed if the reads per kilobase or transcript model  
153 per million mapped reads was  $> 0.4$ . In order to evaluate gene expression differences  
154 between treatments (FRSH or CRYO embryos), we calculated two thresholds: first, we  
155 calculated the random TPM differences between FRSH and CRYO embryos by  
156 permutation of the TPM gene scores. Then we chose the genes whose expression  
157 difference between the two conditions was higher than in 95% ( $P < 0.05$ ) or in 99%  
158 ( $P < 0.01$ ) of the random cases. As a second score, we used a fold change  $\geq 2$  as a  
159 threshold in order to avoid expression biases in the selection of the candidate genes.

160

### 161 **Gene Ontology and pathway analysis**

162

163 The annotations of the candidate genes selected after the RNA-seq analyses were  
164 explored to detect significant differences in molecular pathways between treatments.  
165 Specifically, the DAVID webserver [25] was used to retrieve the terms (gene ontology,  
166 up-expressed tissues, KEGG and reactome pathways, protein-protein interactions, etc)  
167 with significant over-presence of the candidate genes, using a false discovery rate

168 (FDR) < 0.05. We used the human genome as reference for the analysis because of its  
169 increased depth in terms of annotation.

170

## 171 **Network analysis**

172

173 STRING [26] was used to analyze the internal structure of the functional network  
174 obtained using the candidate genes. Data included co-expression, genetic fusion, co-  
175 occurrence or protein-protein interactions, among others. A high threshold (0.700) was  
176 selected for positive interaction between a pair of genes.

177

## 178 **RESULTS**

179

180 A total of 12 conceptuses were analysed (2 FRSH and 2 CRYO at each day). An  
181 average of 29,196 transcripts per embryo were obtained.

182

### 183 ***Day-8 embryos***

184

185 In Day-8 CRYO embryos, 100 transcripts showed increased abundance and 157  
186 transcripts showed decreased abundance in respect to FRSH embryos of the same age  
187 from the same stallion and mare (Fig. 1).

188

189 Of the 100 transcripts showing increased abundance, 23 could be aligned to the genome  
190 build (Supplementary Table 1). These included the *progesterone receptor membrane*  
191 *component (8PGRMC1)*. Enriched biological processes (Fig 2b) included extracellular  
192 region genes *defensing beta 119*, *insulin like 3*, *prostaglandin D2 synthase* and  
193 *uteroglobin*; genes associated with negative regulation of cysteine type endopeptidase  
194 activity involved in apoptotic processes including *nuclear receptor subfamily 4 group A*  
195 *member* and *paired box 2*; and genes involved in skeletal muscle cell differentiation  
196 including *activating transcription factor 3* and *nuclear receptor subfamily 4 group4 A*  
197 *member (Fig 2b)*. STRING analysis revealed no significant enrichments in functional  
198 networks for transcripts with increased abundance.

199

200 Transcripts showing decreased abundance provided more information, with 129  
201 transcripts annotated in the equine database. The complete list of transcripts is presented

202 in Supplementary Table 2. Due to the large number of genes retrieved, the threshold  
203 was reset at  $P < 0.001$  and 62 transcripts were then retrieved (Table 1). Related gene  
204 ontology terms are shown in Fig 2a. STRING analysis, performed using a threshold of  
205 0.700, obtained a protein-protein interaction (PPI) enrichment  $P$  value of  $< 1.0 \times 10^{-16}$   
206 (Fig 4). The complete list of genes in this network with their clustering is presented in  
207 Supplementary File 3. Enriched biological processes included *cellular process, iron ion*  
208 *transport, cellular iron ion homeostasis, metabolic process, response to inorganic*  
209 *substance, biological regulation, single-organism process, cellular macromolecule*  
210 *metabolic process, single organism cellular process, cellular metabolic process,*  
211 *response to stimulus, cellular response to zinc ion, transport, regulation of biological*  
212 *process, oxidation-reduction process, cellular component disassembly, cellular nitrogen*  
213 *compound metabolic process, translation, single organism transport, gene expression,*  
214 *positive regulation of nitrogen compound metabolic process, biological process, protein*  
215 *folding, cellular component organization, regulation of cell proliferation, and primary*  
216 *metabolic process. In addition, enriched terms in KEGG (Kyoto encyclopedia of gene*  
217 *and genomes) pathways included ribosome, Parkinson disease and oxidative*  
218 *phosphorylation (Fig 3a).*

219

### 220 ***Day-10 embryos***

221

222 In Day-10 embryos 239 transcripts showed increased abundance ( $P < 0.01$ ), and 206  
223 showed decreased abundance, in CRYO embryos in comparison with FRSH embryos.

224

225 Of the 239 transcripts showing increased abundance, 53 aligned to the genome build  
226 (Supplementary Table 4). Functional annotation revealed these genes to be related to the  
227 GOterms and KEEG pathways *nucleosome, systemic lupus erythematosus, DNA*  
228 *replication-dependent nucleosome assembly, protein heterodemerization, alcoholism,*  
229 *nuclear chromosome, telomeric region, regulation of gene silencing, nucleosomal DNA*  
230 *binding, membrane, translation, poly (A) RNA binding, viral carcinogenesis, negative*  
231 *regulation of megakaryocyte differentiation, DNA replication independent nucleosome*  
232 *assembly, extracellular exosome, DNA-templated transcription, xenophagy, ribosome,*  
233 *positive regulation of defense to virus by host, DNA binding, mitochondrion, cytosolic*  
234 *large ribosomal subunit, extracellular space, transcriptional misregulation in cancer,*  
235 *innate immune response in mucosa, U1 snRNP, antibacterial humoral response,*

236 *telomerase RNA binding* and *mitochondrial small ribosomal subunit* (Fig2 d). STRING  
237 analysis revealed a PPI enrichment P value of  $< 1.0 \times 10^{-16}$ . Functional enrichment  
238 included the PFAM protein domain *Core histone H2A/H2B/H3/HA* and the INTERPRO  
239 protein domains, including Histone fold, Histone H3/CNEP-A, Histone H2A/H2B/H3,  
240 Histone H4, Histone H4 conserved site, TATA box binding protein associated factor  
241 (TAF) and ribosomal protein L23/L15e core domain.

242

243 Of the 206 transcripts showing decreased abundance in CRYO embryos at Day  
244 10, 115 were aligned. Enriched KEEG pathways that were also detected in 8-Day  
245 embryos (Table 3) included *oxidative phosphorylation*, *Parkinson disease*, *Alzheimer*  
246 *disease*, *Hungtington disease*, *Metabolic pathways*, *Ribosome*, *cardiac muscle*  
247 *contraction*, and *non-alcoholic fatty liver disease*. Three new enriched pathways,  
248 *protein processing in endoplasmic reticulum*, *systemic lupus erythematosus* and  
249 *phagosome*, were detected (Fig 3b). More significantly represented GOterms were *ATP*  
250 *synthesis coupled proton transport*, *translation*, *nucleosome assembly*, *cell redox*  
251 *homeostasis*, *extracellular exosome*, *myelin sheath*, *respiratory chain*, *mitochondrion*,  
252 *extracellular space*, *NADH dehydrogenase (ubiquinone) activity*, *structural constituent*  
253 *of ribosome*, and *proton transporting ATP synthase activity rotational mechanism* (Fig  
254 2c). A complete list of enriched GOterms retrieved are given in Table 4. STRING  
255 analysis revealed functional networks with a PPI enrichment P value of  $< 1.0 \times 10^{-16}$  (Fig  
256 5). Functional enrichment included the PAFM domains *core histone H2A/H2B/H3/H4*,  
257 *thiorredoxin*, *NADH deshydrogenase*, *NADH-Ubiquinone* and *plastoquinone (Complex*  
258 *I)*, *various chains*.

259

## 260 **Day-12 embryos**

261

262 In Day-12 embryos, 149 transcripts showed increased abundance and 157 showed  
263 decreased abundance in CRYO embryos. Of the 149 transcripts with increased  
264 abundance, 61 were annotated (Supplementary Table 5). Enriched KKEG pathways  
265 included *ribosome* and *Parkinson disease* and the GOterms *extracellular exosome*,  
266 *translation*, *structural constituent of ribosome*, *nuclear nucleosome*, *mitochondrial*  
267 *respiratory chain complex I*, *cytosolic large ribosomal subunit*, *nucleosome assembly*,  
268 *methylosome*, and *catalytic step 2 spliceosome*. On STRING analysis, a PPI enrichment  
269 P value of  $< 8 \times 10^{-10}$  was obtained.



270

271 Of the 157 transcripts showing decreased abundance in Day-12 CRYO embryos, 60  
272 transcripts aligned to the genome build (Supplementary Table 6). Enriched KEEG  
273 pathways, also detected in 8- and 10-day embryos, included *oxidative phosphorylation*,  
274 *Parkinson disease*, *metabolic pathways*, *Alzheimer disease*, *Huntington disease*, *non-*  
275 *alcoholic fatty acid liver disease* and *cardiac muscle contraction*. In addition a new  
276 pathway, *folate biosynthesis*, was enriched (see Fig. 3 for comparative enriched KEEG  
277 pathways for transcripts with decreased abundance in 8-, 10- and 12-day CRYO  
278 embryos. GOterms enriched annotations (Fig 2e) were *NADH dehydrogenase*  
279 *(ubiquinone) activity*, *mitochondrial respiratory chain complex I*, *nucleosome*, *DNA*  
280 *replication dependent nucleosome assembly*, *protein heterotetramerization*,  
281 *mitochondrion*, *respiratory chain*, *negative regulation of megakaryocyte differentiation*,  
282 *DNA template transcription initiation*, *ATP synthesis coupled electron transport*,  
283 *nuclear chromosome telomeric region*, *DNA binding*, *oxireductase activity*,  
284 *mitochondrial inner membrane*, *integral component of membrane*, *mitochondrial*  
285 *electron transport NADH to ubiquinone*, and *extracellular exosome*. The complete list  
286 is given in Table 4

287

288 STRING analysis revealed functional networks with a PPI enrichment P value of  $< 1.0$   
289  $\times 10^{-16}$  (Fig 6). Functional enrichment included the PFAM protein domains *core histone*  
290 *H2A/H2B/H3/H4*, *NADH dehydrogenase*, and *NADH-ubiquinone/plastoquinone*  
291 *(complex I various chains)*.

292

### 293 ***Comparison of downregulated genes with the mouse genome database***

294

295 In order to explore mechanisms that may relate to reduced viability in embryos obtained  
296 using cryopreserved semen, the Mouse Genome Database [27, 28] was queried to  
297 determine whether genes downregulated in CRYO equine embryos were orthologs to  
298 mouse genes with known associations with embryo lethality.

299

### 300 **Day-8 embryos**

301

302 In Day-8 CRYO embryos, transcripts of genes associated with the following terms were  
303 found to be of low abundance: *failure of zygotic division*, *decreased embryo size*,

304 *abnormal embryo size, embryonic growth arrest, embryonic growth retardation,*  
305 *embryonic lethality before implantation-complete penetrance, embryonic lethality*  
306 *between implantation and somite formation-complete penetrance, embryonic lethality*  
307 *between somite formation and embryo turning-complete penetrance, embryonic lethality*  
308 *prior to tooth bud stage, abnormal embryonic tissue morphology, abnormal*  
309 *extraembryonic tissue morphology, delayed allantois development, perinatal lethality*  
310 *incomplete penetrance, prenatal lethality-complete penetrance, preweaning lethality-*  
311 *complete penetrance, abnormal male germ cell apoptosis, abnormal spermatogenesis,*  
312 *azoospermia, male infertility and female infertility.*

313

#### 314 **Day 10 embryos**

315

316 In Day-10 CRYO embryos, the following gene associations cited above for Day-8  
317 embryos were found: *decreased embryo size, abnormal embryo size, failure of zygotic*  
318 *cell division, embryonic lethality between implantation and somite formation,*  
319 *embryonic lethality between implantation and somite formation-complete penetrance,*  
320 *embryonic lethality prior to tooth bud stage, prenatal lethality-complete penetrance,*  
321 *perinatal lethality-incomplete penetrance, preweaning lethality, preweaning lethality-*  
322 *complete penetrance, and abnormal spermatogenesis.*

323

324 In addition, the following associations were found: *abnormal blastocyst morphology,*  
325 *absent blastocoele, abnormal inner cell mass morphology, absent inner cell mass*  
326 *proliferation, empty decidua capsularis, embryonic growth retardation, failure of*  
327 *blastocyst to hatch from the zona pellucida, abnormal preimplantation embryo*  
328 *development, failure to gastrulate, embryonic lethality prior to embryogenesis, failure*  
329 *of embryo implantation, abnormal decidua basalis morphology, abnormal*  
330 *extraembryonic endoderm formation, prenatal lethality prior to heart atrial septation,*  
331 *decreased fetal size, preweaning lethality incomplete penetrance, abnormal*  
332 *gametogenesis, abnormal spermatid morphology, abnormal vas deferens morphology,*  
333 *decreased mature ovarian follicle number, reduced female fertility and small ovary.*

334

#### 335 **Day 12 embryos**

336

337 In 12-day CRYO embryos the following gene associations cited above were found:  
338 *abnormal embryo size, decreased embryo size, prenatal lethality prior to heart atrial*  
339 *septation, embryonic lethality prior to tooth bud stage, preweaning lethality-complete*  
340 *penetrance, male infertility, female infertility, and small ovary.*

341

342 In addition, the following associations were found: *incomplete embryo turning,*  
343 *embryonic lethality prior to organogenesis, embryonic lethality during organogenesis-*  
344 *complete penetrance, decreased FSH level, small seminal vesicle, small seminiferous*  
345 *tubules, small testis, absent mature ovarian follicles, abnormal ovulation, abnormal*  
346 *corpus luteum morphology, uterus hypoplasia, and vaginal atresia.*

347

## 348 **DISCUSSION**

349

350 Here we report, for the first time, evidence that procedures performed during handling  
351 of sperm, such as freezing and thawing, have a significant impact on critical aspects of  
352 the early embryo transcriptome. The equine model used in our study has a number of  
353 advantages, including a long pre-attachment embryonic period in which the embryo  
354 remains spherical, which facilitates embryo collection, and the possibility of repeated  
355 embryo collections from the same animals over successive estrus cycles. Additionally,  
356 the stallion serves as an excellent model for the human male, as stallions are typically  
357 not selected for sperm quality nor the ability of semen to be cryopreserved, in contrast  
358 to males in production species, such as the bull. Moreover, since many stallions reach  
359 advanced age, the horse can be used as a model to study the impact of paternal age on  
360 embryo quality.

361

362 Our study, focused on three embryo ages (8, 10 and 12 days post ovulation),  
363 revealed a significant impact of sperm cryopreservation on the transcriptome of the  
364 resulting embryo. Importantly, transcripts with decreased abundance reflected genes  
365 related to DNA replication and assembly and oxidative phosphorylation. Exploration of  
366 differentially-expressed genes at the molecular and cellular level revealed alterations in  
367 important functions including ATP synthesis, regulation of transcription, nucleosome  
368 assembly, chromatin silencing, protein synthesis, and redox regulation. Alterations in  
369 these genes help to explain the reduced fertility observed with cryopreserved sperm  
370 attributable to increased early embryo mortality [9, 10].

371 The pre-implantation period is a period of rapid embryo growth, requiring a  
372 ready supply of ATP. The equine embryo appears to have a significant capacity for  
373 glycolysis, but also uses oxidative phosphorylation [29]. The KEEG pathways analysis  
374 of downregulated genes revealed enriched annotations for oxidative phosphorylation,  
375 pyruvate metabolism, glycolysis, and the TCA cycle, suggesting compromised energy  
376 metabolism in CRYO embryos. A similar picture was observed in Day-10 and Day-12  
377 embryos, with the pathways for oxidative phosphorylation, metabolic pathways, and  
378 non alcoholic fatty liver disease significantly over-represented in transcripts with  
379 reduced abundance of all CRYO embryos obtained.

380 When we evaluated low-abundance equine transcripts for their mouse orthologs,  
381 we found that many of the genes downregulated in CRYO embryos have knockout  
382 database annotation terms related to reduced embryonic viability. This finding indicates  
383 that not only genes related to the metabolism and thus growth of embryos, but also  
384 genes directly related to embryo organogenesis, embryo survival, and offspring health  
385 are affected by the use of cryopreserved sperm.

386 While the mechanisms behind the effects reported here are as yet unclear, a  
387 major factor may be the well-documented oxidative damage that the genome and  
388 epigenome experiences during cryopreservation and thawing [9-12]. Cryopreservation  
389 is a major cause of oxidative stress [30] and lipid peroxidation in stallion spermatozoa  
390 [8, 14, 31, 32]. Lipid peroxidation in spermatozoa surviving cryopreservation [30] is  
391 associated with increased levels of 4-hydroxynonenal (4-HNE) [14]. This compound is  
392 able to interact with DNA to form adducts that have been related directly to increased  
393 rates of mutation in important cell-cycle regulators [33, 34]. The production of 4-HNE  
394 during cryopreservation of stallion spermatozoa is well documented [8, 14, 32], and it is  
395 possible that significant amounts of 4-HNE and other toxic lipid aldehydes are  
396 incorporated to the oocyte, potentially causing alterations in embryo development. In  
397 addition to DNA damage, 4-HNE can alkylate the sperm centrioles, and in horses, as in  
398 humans, paternal centrioles are inherited by the embryos. Damaged centrioles may  
399 cause disrupted cytoskeletal protein organization during early cleavage [35].

400 Supporting this line of reasoning, recent reports have linked abnormal early  
401 cleavage events and changes in embryo transcript abundance to fertilization with  
402 spermatozoa showing oxidative stress. Macaque embryos obtained after fertilization  
403 with ROS-treated sperm showed significantly lower rates of development to the four-  
404 and eight-cell stages, and changes in transcript abundance for genes related to actin

405 cytoskeleton organization, cell junction assembly and cell adhesion [36]. In our study  
406 we also found that genes for cytoskeleton components *tubulin alpha 1 a*, *tubulin beta 2*  
407 *class II a* and *actin, cytoplasmic 1, N-terminally processed* were downregulated in 8-  
408 day CRYO embryos.

409 Cryopreservation may also directly affect the epigenome of the paternal DNA;  
410 recent studies have shown that cryopreservation increases the level of DNA methylation  
411 in equine sperm [10] and the expression of genes important to intracellular regulation of  
412 epigenetic status [37]. Notably, we also found significant reduction in abundance of  
413 transcripts for histones in CRYO embryos.

414 The finding that many differentially regulated genes in CRYO embryos are  
415 orthologs of mouse genes that have knockout database annotation terms related to  
416 reduced embryonic viability provides further evidence linking cryopreserved sperm to  
417 reduced embryonic viability. These annotations consistently appeared on analysis of  
418 low-abundance transcripts in all CRYO embryos, and included genes related to  
419 embryonic growth retardation and embryo lethality. Interestingly, annotations related to  
420 male and female infertility were also present; this warrants further investigation on the  
421 effect of sperm origin on the fertility of resulting offspring.

422 In summary, the present study provides for the first time transcriptomic analysis  
423 of equine embryos in relation to the handling of semen used for their production. Our  
424 data provide strong evidence that cryopreservation of sperm exerts a profound impact  
425 on the transcriptome of early embryos. Our findings may stimulate new lines of  
426 research to improve this biotechnology in humans and animals

427

428

#### 429 **Declaration of Interest**

430 The authors declare that there are no conflicts of interest that could be perceived to  
431 prejudice the reported research.

432

433

#### 434 **REFERENCES**

435

436 1. Pena FJ, Garcia BM, Samper JC, Aparicio IM, Tapia JA, Ferrusola CO.  
437 Dissecting the molecular damage to stallion spermatozoa: the way to improve  
438 current cryopreservation protocols? *Theriogenology*. 2011;76(7):1177-86. doi:  
439 10.1016/j.theriogenology.2011.06.023. PubMed PMID: 21835453.

- 440 2. Dearing CG, Jayasena CN, Lindsay KS. Human sperm cryopreservation  
441 in cancer patients: Links with deprivation and mortality. *Cryobiology*. 2017;79:9-  
442 13. doi: 10.1016/j.cryobiol.2017.10.003. PubMed PMID: 29031884.
- 443 3. Jiang XP, Zhou WM, Wang SQ, Wang W, Tang JY, Xu Z, et al.  
444 Multivariate model for predicting semen cryopreservation outcomes in a human  
445 sperm bank. *Asian J Androl*. 2017;19(4):404-8. doi: 10.4103/1008-  
446 682X.178488. PubMed PMID: 27080478; PubMed Central PMCID:  
447 PMC5507083.
- 448 4. Lewis N, Morganti, M., Collingwood, F., Grove-White, D.H., Argo, C.M.  
449 Utilization of one dose post ovulation breeding with frozen thawed semen at a  
450 commercial artificial insemination center: pregnancy rates and post breeding  
451 uterine fluid accumulation in comparison with chilled of fresh semen *J Equine*  
452 *Vet Sci*. 2015;35:882-7.
- 453 5. Jodar M, Selvaraju S, Sendler E, Diamond MP, Krawetz SA,  
454 Reproductive Medicine N. The presence, role and clinical use of spermatozoal  
455 RNAs. *Hum Reprod Update*. 2013;19(6):604-24. doi: 10.1093/humupd/dmt031.  
456 PubMed PMID: 23856356; PubMed Central PMCID: PMC3796946.
- 457 6. Sendler E, Johnson GD, Mao S, Goodrich RJ, Diamond MP, Hauser R,  
458 et al. Stability, delivery and functions of human sperm RNAs at fertilization.  
459 *Nucleic Acids Res*. 2013;41(7):4104-17. doi: 10.1093/nar/gkt132. PubMed  
460 PMID: 23471003; PubMed Central PMCID: PMC3627604.
- 461 7. Davila MP, Munoz PM, Bolanos JM, Stout TA, Gadella BM, Tapia JA, et  
462 al. Mitochondrial ATP is required for the maintenance of membrane integrity in  
463 stallion spermatozoa, whereas motility requires both glycolysis and oxidative  
464 phosphorylation. *Reproduction*. 2016;152(6):683-94. doi: 10.1530/REP-16-  
465 0409. PubMed PMID: 27798283.
- 466 8. Pena FJ, Plaza Davila M, Ball BA, Squires EL, Martin Munoz P, Ortega  
467 Ferrusola C, et al. The Impact of Reproductive Technologies on Stallion  
468 Mitochondrial Function. *Reprod Domest Anim*. 2015;50(4):529-37. doi:  
469 10.1111/rda.12551. PubMed PMID: 26031351.
- 470 9. Kopeika J, Thornhill A, Khalaf Y. The effect of cryopreservation on the  
471 genome of gametes and embryos: principles of cryobiology and critical  
472 appraisal of the evidence. *Hum Reprod Update*. 2015;21(2):209-27. doi:  
473 10.1093/humupd/dmu063. PubMed PMID: 25519143.
- 474 10. Aurich C, Schreiner B, Ille N, Alvarenga M, Scarlet D. Cytosine  
475 methylation of sperm DNA in horse semen after cryopreservation.  
476 *Theriogenology*. 2016;86(5):1347-52. doi:  
477 10.1016/j.theriogenology.2016.04.077. PubMed PMID: 27242182.
- 478 11. Valcarce DG, Carton-Garcia F, Riesco MF, Herraiz MP, Robles V.  
479 Analysis of DNA damage after human sperm cryopreservation in genes crucial  
480 for fertilization and early embryo development. *Andrology*. 2013;1(5):723-30.  
481 doi: 10.1111/j.2047-2927.2013.00116.x. PubMed PMID: 23970451.
- 482 12. Valcarce DG, Carton-Garcia F, Herraiz MP, Robles V. Effect of  
483 cryopreservation on human sperm messenger RNAs crucial for fertilization and  
484 early embryo development. *Cryobiology*. 2013;67(1):84-90. doi:  
485 10.1016/j.cryobiol.2013.05.007. PubMed PMID: 23727067.
- 486 13. Teperek M, Simeone A, Gaggioli V, Miyamoto K, Allen GE, Erkek S, et  
487 al. Sperm is epigenetically programmed to regulate gene transcription in  
488 embryos. *Genome Res*. 2016;26(8):1034-46. doi: 10.1101/gr.201541.115.  
489 PubMed PMID: 27034506; PubMed Central PMCID: PMC4971762.

- 490 14. Martin Munoz P, Ortega Ferrusola C, Vizuete G, Plaza Davila M,  
491 Rodriguez Martinez H, Pena FJ. Depletion of Intracellular Thiols and Increased  
492 Production of 4-Hydroxynonenal that Occur During Cryopreservation of Stallion  
493 Spermatozoa Lead to Caspase Activation, Loss of Motility, and Cell Death. *Biol*  
494 *Reprod.* 2015;93(6):143. doi: 10.1095/biolreprod.115.132878. PubMed PMID:  
495 26536905.
- 496 15. Plaza Davila M, Martin Munoz P, Tapia JA, Ortega Ferrusola C, Balao da  
497 Silva CC, Pena FJ. Inhibition of Mitochondrial Complex I Leads to Decreased  
498 Motility and Membrane Integrity Related to Increased Hydrogen Peroxide and  
499 Reduced ATP Production, while the Inhibition of Glycolysis Has Less Impact on  
500 Sperm Motility. *PLoS One.* 2015;10(9):e0138777. doi:  
501 10.1371/journal.pone.0138777. PubMed PMID: 26407142; PubMed Central  
502 PMCID: PMC4583303.
- 503 16. Timme-Laragy AR, Hahn ME, Hansen JM, Rastogi A, Roy MA. Redox  
504 stress and signaling during vertebrate embryonic development: Regulation and  
505 responses. *Semin Cell Dev Biol.* 2017. doi: 10.1016/j.semcdb.2017.09.019.  
506 PubMed PMID: 28927759; PubMed Central PMCID: PMC4583303.
- 507 17. Fernandez-Gonzalez R, Moreira PN, Perez-Crespo M, Sanchez-Martin  
508 M, Ramirez MA, Pericuesta E, et al. Long-term effects of mouse  
509 intracytoplasmic sperm injection with DNA-fragmented sperm on health and  
510 behavior of adult offspring. *Biol Reprod.* 2008;78(4):761-72. doi:  
511 10.1095/biolreprod.107.065623. PubMed PMID: 18199884.
- 512 18. Bouckenheimer J, Assou S, Riquier S, Hou C, Philippe N, Sansac C, et  
513 al. Long non-coding RNAs in human early embryonic development and their  
514 potential in ART. *Hum Reprod Update.* 2016;23(1):19-40. doi:  
515 10.1093/humupd/dmw035. PubMed PMID: 27655590.
- 516 19. Chen Q, Yan W, Duan E. Epigenetic inheritance of acquired traits  
517 through sperm RNAs and sperm RNA modifications. *Nat Rev Genet.*  
518 2016;17(12):733-43. doi: 10.1038/nrg.2016.106. PubMed PMID: 27694809;  
519 PubMed Central PMCID: PMC4583303.
- 520 20. Saunders CM, Larman MG, Parrington J, Cox LJ, Royse J, Blayney LM,  
521 et al. PLC zeta: a sperm-specific trigger of Ca(2+) oscillations in eggs and  
522 embryo development. *Development.* 2002;129(15):3533-44. PubMed PMID:  
523 12117804.
- 524 21. Fujimoto S, Yoshida N, Fukui T, Amanai M, Isobe T, Itagaki C, et al.  
525 Mammalian phospholipase C zeta induces oocyte activation from the sperm  
526 perinuclear matrix. *Dev Biol.* 2004;274(2):370-83. doi:  
527 10.1016/j.ydbio.2004.07.025. PubMed PMID: 15385165.
- 528 22. Banrezes B, Sainte-Beuve T, Canon E, Schultz RM, Cancela J, Ozil JP.  
529 Adult body weight is programmed by a redox-regulated and energy-dependent  
530 process during the pronuclear stage in mouse. *PLoS One.* 2011;6(12):e29388.  
531 doi: 10.1371/journal.pone.0029388. PubMed PMID: 22216268; PubMed Central  
532 PMCID: PMC3247262.
- 533 23. Iqbal K, Chitwood JL, Meyers-Brown GA, Roser JF, Ross PJ. RNA-seq  
534 transcriptome profiling of equine inner cell mass and trophectoderm. *Biol*  
535 *Reprod.* 2014;90(3):61. doi: 10.1095/biolreprod.113.113928. PubMed PMID:  
536 24478389; PubMed Central PMCID: PMC4435230.
- 537 24. Cuervo-Arango J, Aguilar J, Newcombe JR. Effect of type of semen, time  
538 of insemination relative to ovulation and embryo transfer on early equine  
539 embryonic vesicle growth as determined by ultrasound. *Theriogenology.*

- 540 2009;71(8):1267-75. doi: 10.1016/j.theriogenology.2008.12.020. PubMed PMID:  
541 19246082.
- 542 25. Jiao X, Sherman BT, Huang da W, Stephens R, Baseler MW, Lane HC,  
543 et al. DAVID-WS: a stateful web service to facilitate gene/protein list analysis.  
544 *Bioinformatics*. 2012;28(13):1805-6. doi: 10.1093/bioinformatics/bts251.  
545 PubMed PMID: 22543366; PubMed Central PMCID: PMCPMC3381967.
- 546 26. Szklarczyk D, Franceschini A, Wyder S, Forslund K, Heller D, Huerta-  
547 Cepas J, et al. STRING v10: protein-protein interaction networks, integrated  
548 over the tree of life. *Nucleic Acids Res*. 2015;43(Database issue):D447-52. doi:  
549 10.1093/nar/gku1003. PubMed PMID: 25352553; PubMed Central PMCID:  
550 PMCPMC4383874.
- 551 27. Blake JA, Bult CJ, Eppig JT, Kadin JA, Richardson JE, Mouse Genome  
552 Database G. The Mouse Genome Database genotypes::phenotypes. *Nucleic  
553 Acids Res*. 2009;37(Database issue):D712-9. doi: 10.1093/nar/gkn886.  
554 PubMed PMID: 18981050; PubMed Central PMCID: PMCPMC2686566.
- 555 28. Bult CJ, Eppig JT, Kadin JA, Richardson JE, Blake JA, Mouse Genome  
556 Database G. The Mouse Genome Database (MGD): mouse biology and model  
557 systems. *Nucleic Acids Res*. 2008;36(Database issue):D724-8. doi:  
558 10.1093/nar/gkm961. PubMed PMID: 18158299; PubMed Central PMCID:  
559 PMCPMC2238849.
- 560 29. Lane M, O'Donovan MK, Squires EL, Seidel GE, Jr., Gardner DK.  
561 Assessment of metabolism of equine morulae and blastocysts. *Mol Reprod  
562 Dev*. 2001;59(1):33-7. doi: 10.1002/mrd.1004. PubMed PMID: 11335944.
- 563 30. Ortega Ferrusola C, Gonzalez Fernandez L, Morrell JM, Salazar  
564 Sandoval C, Macias Garcia B, Rodriguez-Martinez H, et al. Lipid peroxidation,  
565 assessed with BODIPY-C11, increases after cryopreservation of stallion  
566 spermatozoa, is stallion-dependent and is related to apoptotic-like changes.  
567 *Reproduction*. 2009;138(1):55-63. doi: 10.1530/REP-08-0484. PubMed PMID:  
568 19380427.
- 569 31. Ortega-Ferrusola C, Anel-Lopez L, Martin-Munoz P, Ortiz-Rodriguez JM,  
570 Gil MC, Alvarez M, et al. Computational flow cytometry reveals that  
571 cryopreservation induces spermatosis but subpopulations of spermatozoa may  
572 experience capacitation-like changes. *Reproduction*. 2017;153(3):293-304. doi:  
573 10.1530/REP-16-0539. PubMed PMID: 27965398.
- 574 32. Munoz PM, Ferrusola CO, Lopez LA, Del Petre C, Garcia MA, de Paz  
575 Cabello P, et al. Caspase 3 Activity and Lipoperoxidative Status in Raw Semen  
576 Predict the Outcome of Cryopreservation of Stallion Spermatozoa. *Biol Reprod*.  
577 2016;95(3):53. doi: 10.1095/biolreprod.116.139444. PubMed PMID: 27417910.
- 578 33. Feng Z, Hu W, Amin S, Tang MS. Mutational spectrum and genotoxicity  
579 of the major lipid peroxidation product, trans-4-hydroxy-2-nonenal, induced DNA  
580 adducts in nucleotide excision repair-proficient and -deficient human cells.  
581 *Biochemistry*. 2003;42(25):7848-54. doi: 10.1021/bi034431g. PubMed PMID:  
582 12820894.
- 583 34. Wei X, Yin H. Covalent modification of DNA by alpha, beta-unsaturated  
584 aldehydes derived from lipid peroxidation: Recent progress and challenges.  
585 *Free Radic Res*. 2015;49(7):905-17. doi: 10.3109/10715762.2015.1040009.  
586 PubMed PMID: 25968945.
- 587 35. Lu Y, Lin M, Aitken RJ. Exposure of spermatozoa to dibutyl phthalate  
588 induces abnormal embryonic development in a marine invertebrate *Galeolaria*



589 caespitosa (Polychaeta: Serpulidae). *Aquat Toxicol.* 2017;191:189-200. doi:  
590 10.1016/j.aquatox.2017.08.008. PubMed PMID: 28843738.  
591 36. Burruel V, Klooster KL, Chitwood J, Ross PJ, Meyers SA. Oxidative  
592 damage to rhesus macaque spermatozoa results in mitotic arrest and transcript  
593 abundance changes in early embryos. *Biol Reprod.* 2013;89(3):72. doi:  
594 10.1095/biolreprod.113.110981. PubMed PMID: 23904511; PubMed Central  
595 PMCID: PMCPMC4094196.  
596 37. Zeng C, Peng W, Ding L, He L, Zhang Y, Fang D, et al. A preliminary  
597 study on epigenetic changes during boar spermatozoa cryopreservation.  
598 *Cryobiology.* 2014;69(1):119-27. doi: 10.1016/j.cryobiol.2014.06.003. PubMed  
599 PMID: 24974820.

600

601

602

603

604

605

606

607

608

609

610 Table 1.- Enriched biological processes from DEGs (downregulated) in 8 days embryos  
611 obtained after AI with frozen thawed sperm, as identified by DAVID functional  
612 annotation analysis

613

| <b>Functional terms of overrepresented biological processes <sup>a</sup></b> | <b>P value <sup>b</sup></b> |
|------------------------------------------------------------------------------|-----------------------------|
| Chromosome (21, 35.78)                                                       | 7.1 x10 <sup>-26</sup>      |
| Nucleosome core (19, 42.08)                                                  | 9.2 x10 <sup>-25</sup>      |
| Extracellular exosome (62, 3.56)                                             | 5.7 x10 <sup>-22</sup>      |
| Histone fold (19, 30.02)                                                     | 7.5 x10 <sup>-22</sup>      |
| Structural constituent of ribosome (24, 13.82)                               | 5.8 x10 <sup>-20</sup>      |
| Ribosome (24, 12.89)                                                         | 1.21 x10 <sup>-19</sup>     |
| Histone core (15, 36.91)                                                     | 1.69 x10 <sup>-18</sup>     |
| Translation (21, 14.65)                                                      | 7.15 x10 <sup>-18</sup>     |
| Myelin sheath (18, 16.63)                                                    | 3.87 x10 <sup>-16</sup>     |
| Nucleosome (13, 31.72)                                                       | 4.20 x10 <sup>-15</sup>     |
| Ribonucleoprotein (14, 24.48)                                                | 1.15 x10 <sup>-14</sup>     |

|                                                                            |                         |
|----------------------------------------------------------------------------|-------------------------|
| Ribosomal protein (13, 29.28)                                              | 1.39 x10 <sup>-14</sup> |
| Nucleosome assembly (13, 23.18)                                            | 2.14 x10 <sup>-13</sup> |
| Poly (A) RNA binding (34, 4.29)                                            | 4.69 x10 <sup>-13</sup> |
| Nuclear nucleosome (10, 40.67)                                             | 1.37 x10 <sup>-12</sup> |
| Parkinson's disease (18, 9.52)                                             | 2.60 x10 <sup>-12</sup> |
| Cytosolic small ribosomal subunit (10, 33.98)                              | 8.65 x10 <sup>-12</sup> |
| Cytosolic large ribosomal subunit (11, 24.85)                              | 1.46 x10 <sup>-11</sup> |
| Systemic lupus erythematosus (16, 10.14)                                   | 2.51 x10 <sup>-11</sup> |
| Hungtinton's disease (19, 7.38)                                            | 4.19 x10 <sup>-11</sup> |
| H2B (8, 52.06)                                                             | 7.18 x10 <sup>-11</sup> |
| Nucleus (26, 4.79)                                                         | 8.79 x10 <sup>-11</sup> |
| Oxidative phosphorylation (16, 9.01)                                       | 1,43 x10 <sup>-10</sup> |
| Histone H2B (8, 48.75)                                                     | 1.48 x10 <sup>-10</sup> |
| DNA binding (21, 6.06)                                                     | 1.81 x10 <sup>-10</sup> |
| Membrane (27, 4.21)                                                        | 4.82 x10 <sup>-10</sup> |
| Alzheimer disease (17, 7.38)                                               | 6.32 x10 <sup>-10</sup> |
| Alcoholism (16, 7.17)                                                      | 3.64 x10 <sup>-9</sup>  |
| ATP synthesis coupled proton transport (7, 41.39)                          | 1.0x10 <sup>-8</sup>    |
| Innate immune response in mucose (6, 51.80)                                | 5.89x10 <sup>-8</sup>   |
| Antibacterial humoral response (6, 48.15)                                  | 9.1x10 <sup>-8</sup>    |
| Focal adhesion (15, 6.10)                                                  | 1.38x10 <sup>-7</sup>   |
| DNA binding (18, 4.18)                                                     | 1.02x10 <sup>-6</sup>   |
| DNA replication dependent nucleosome assembly (6, 30.64)                   | 1.13x10 <sup>-6</sup>   |
| Hydrogen ion transport (5, 55.38)                                          | 1.38x10 <sup>-6</sup>   |
| Protein heterotetramerizacion (6, 29.31)                                   | 1.44x10 <sup>-6</sup>   |
| Proton transporting ATP synthase activity, rotational mechanism (5, 51.26) | 1.66x10 <sup>-6</sup>   |
| Cytoplasm (11, 5.91)                                                       | 1.60x10 <sup>-5</sup>   |
| Cytoplasmatic translation (5, 29.56)                                       | 2.00x10 <sup>-5</sup>   |
| H4 (4, 60.63)                                                              | 2.86 x10 <sup>-5</sup>  |
| Viral carcinogenesis (13, 4.39)                                            | 3.09x x10 <sup>-5</sup> |
| Cardiac muscle contraction (8, 8.53)                                       | 3.57 x10 <sup>-5</sup>  |

|                                                                     |                        |
|---------------------------------------------------------------------|------------------------|
| Histone H4 (4, 56.81)                                               | 3.68 x10 <sup>-5</sup> |
| Histone H4 conserved site (4, 56.81)                                | 3.68 x10 <sup>-5</sup> |
| TAF (4, 56.88)                                                      | 5.56 x10 <sup>-5</sup> |
| Defense response to gram positive bacterium (6, 49.69)              | 6.14 x10 <sup>-5</sup> |
| Tata Box binding protein associated factor (TAF) (4, 14.04)         | 7.14 x10 <sup>-5</sup> |
| Negative regulation of megakaryocyte differentiation (4, 46.53)     | 1.04 x10 <sup>-4</sup> |
| ATP hydrolysis coupled ion transport (5, 40.85)                     | 1.14 x10 <sup>-4</sup> |
| Acetylation (6, 19.37)                                              | 1.32 x10 <sup>-4</sup> |
| H2A (4, 12.08)                                                      | 3.67 x10 <sup>-4</sup> |
| Mitochondrial electron transport, cytochrome c to oxygen (3, 27.33) | 4.57 x10 <sup>-4</sup> |
| Ribosomal large subunit assembly (4 , 84.27)                        | 4.94 x10 <sup>-4</sup> |
| DNA replication independent nucleosome assembly (4, 24.96)          | 4.94 x10 <sup>-4</sup> |
| Histone H2A (4, 24.37)                                              | 5.44 x10 <sup>-4</sup> |
| V-ATPase proteolipid subunit C-like domain (3, 76.78)               | 5.86 x10 <sup>-4</sup> |
| DNA templated transcription, initiation (4, 22.47)                  | 6.81 x10 <sup>-4</sup> |
| Nuclear chromosome, telomeric region (6, 8.22)                      | 7.79 x10 <sup>-4</sup> |
| Non alcoholic fatty liver disease (NAFLD) (9, 4.40)                 | 8.75 x10 <sup>-4</sup> |
| Lactate/malate dehydrogenase (3, 63.99)                             | 8.74 x10 <sup>-4</sup> |
| Lactate malate dehydrogenase, N –terminal (3, 63.99)                | 8.74 x10 <sup>-4</sup> |
| Mitochondrial proton transporting ATP synthase complex (3, 61.00)   | 9.60 x10 <sup>-4</sup> |

614 <sup>a</sup> Values in parenthesis represent the number of genes involved in and the fold  
615 enrichment of the corresponding functional terms

616 <sup>b</sup> EASE score examine the significance of gene term enrichment with a modified  
617 Fisher's exact test

618

619

620

621

622

623

624

625

626

627

628

629

630

631 Table 2. Selected enriched Kyoto Encyclopedia of genes and genomes (KEEG)  
632 pathways enriched in downregulated transcripts of in 10 days embryos obtained after AI  
633 with frozen thawed sperm

| <b>KEEG pathway</b> | <b>Pathway description</b>                  | <b>observed count</b> | <b>gene false discovery rate</b> |
|---------------------|---------------------------------------------|-----------------------|----------------------------------|
| 190                 | Oxidative phosphorylation                   | 21                    | 2,45E-23                         |
| 5012                | Parkinson s disease                         | 20                    | 4,64E-21                         |
| 5010                | Alzheimer s disease                         | 15                    | 1,05E-12                         |
| 5016                | Huntington s disease                        | 15                    | 3,42E-12                         |
| 1100                | Metabolic pathways                          | 28                    | 4,29E-09                         |
| 3010                | Ribosome                                    | 11                    | 8,96E-09                         |
| 4260                | Cardiac muscle contraction                  | 7                     | 2,56E-06                         |
| 4932                | Non-alcoholic fatty liver disease (NAFLD)   | 9                     | 3,96E-06                         |
| 4141                | Protein processing in endoplasmic reticulum | 9                     | 1,61E-05                         |

634

635

636

637

638

639

640

641

642

643

644

645

646

647

648

649

650

651

652

653

654

655

656

657 Table 3.- Gene ontology annotations enriched in downregulated transcripts of 10 days

658 embryos obtained after AI with frozen thawed sperm

659

| <b>Term</b>                                                                | <b>P Value</b> |
|----------------------------------------------------------------------------|----------------|
| GO:0070062~extracellular exosome                                           | 1,72E-09       |
| GO:0043209~myelin sheath                                                   | 3,03E-09       |
| GO:0070469~respiratory chain                                               | 6,30E-08       |
| GO:0022625~cytosolic large ribosomal subunit                               | 5,33E-07       |
| GO:0008137~NADH dehydrogenase (ubiquinone) activity                        | 8,07E-07       |
| GO:0005747~mitochondrial respiratory chain complex I                       | 3,12E-06       |
| GO:0015986~ATP synthesis coupled proton transport                          | 4,78E-06       |
| GO:0003735~structural constituent of ribosome                              | 1,66E-05       |
| GO:0000788~nuclear nucleosome                                              | 2,25E-05       |
| GO:0046933~proton-transporting ATP synthase activity, rotational mechanism | 2,90E-05       |
| GO:0005925~focal adhesion                                                  | 4,41E-05       |
| GO:0006412~translation                                                     | 5,75E-05       |
| GO:0046961~proton-transporting ATPase activity, rotational mechanism       | 1,59E-04       |
| GO:0000786~nucleosome                                                      | 1,73E-04       |
| GO:0042773~ATP synthesis coupled electron transport                        | 2,22E-04       |
| GO:0006334~nucleosome assembly                                             | 5,99E-04       |
| GO:0005743~mitochondrial inner membrane                                    | 0,001576512    |
| GO:0004129~cytochrome-c oxidase activity                                   | 0,002995144    |
| GO:0005739~mitochondrion                                                   | 0,00444262     |
| GO:0006336~DNA replication-independent nucleosome assembly                 | 0,005364717    |
| GO:0045261~proton-transporting ATP synthase complex, catalytic core F(1)   | 0,011191606    |
| GO:0015991~ATP hydrolysis coupled proton transport                         | 0,013628447    |
| GO:0006457~protein folding                                                 | 0,017943471    |
| GO:0051603~proteolysis involved in cellular protein catabolic process      | 0,019505148    |
| GO:0003677~DNA binding                                                     | 0,022056606    |
| GO:0006123~mitochondrial electron transport, cytochrome c to oxygen        | 0,024396132    |
| GO:0044822~poly(A) RNA binding                                             | 0,032707627    |
| GO:0005753~mitochondrial proton-transporting ATP synthase complex          | 0,0332053      |
| GO:0005615~extracellular space                                             | 0,040768468    |

|                                                                                                                         |             |
|-------------------------------------------------------------------------------------------------------------------------|-------------|
| GO:0005687~U4 snRNP                                                                                                     | 0,044030068 |
| GO:0045454~cell redox homeostasis                                                                                       | 0,047994139 |
| GO:0006122~mitochondrial electron transport, ubiquinol to cytochrome c                                                  | 0,048204941 |
| GO:1902166~negative regulation of intrinsic apoptotic signaling pathway in response to DNA damage by p53 class mediator | 0,054067016 |
| GO:0006120~mitochondrial electron transport, NADH to ubiquinone                                                         | 0,059893472 |
| GO:0045653~negative regulation of megakaryocyte differentiation                                                         | 0,065684522 |
| GO:0030330~DNA damage response, signal transduction by p53 class mediator                                               | 0,065684522 |
| GO:0016020~membrane                                                                                                     | 0,071097195 |
| GO:0004185~serine-type carboxypeptidase activity                                                                        | 0,07400431  |
| GO:0034719~SMN-Sm protein complex                                                                                       | 0,075791838 |
| GO:0005685~U1 snRNP                                                                                                     | 0,075791838 |
| GO:0002227~innate immune response in mucosa                                                                             | 0,077161252 |
| GO:0007569~cell aging                                                                                                   | 0,077161252 |
| GO:0005682~U5 snRNP                                                                                                     | 0,080983251 |
| GO:0071157~negative regulation of cell cycle arrest                                                                     | 0,082847353 |
| GO:0019731~antibacterial humoral response                                                                               | 0,082847353 |
| GO:0005975~carbohydrate metabolic process                                                                               | 0,083234703 |
| GO:0005686~U2 snRNP                                                                                                     | 0,086145885 |
| GO:0030970~retrograde protein transport, ER to cytosol                                                                  | 0,088498889 |
| GO:0000784~nuclear chromosome, telomeric region                                                                         | 0,089088094 |
| GO:0045787~positive regulation of cell cycle                                                                            | 0,094116067 |

660

661

662

663

664

665

666

667

668

669

670

671

672

673

674

675

676

677

678

679

680

681

682 Table 4. Functional annotation chart of DEGs (downregulated) in 12 days equine

683 embryos obtained after AI with frozen thawed sperm.

684

| Category             | Term                                                 | Count | PValue      |
|----------------------|------------------------------------------------------|-------|-------------|
| UP_KEYWORDS          | Membrane                                             | 22    | 0,035165176 |
| GOTERM_CC_DI<br>RECT | GO:0016021~integral component of membrane            | 19    | 0,023827798 |
| KEGG_PATHWAY         | ecb01100:Metabolic pathways                          | 18    | 8,33E-05    |
| GOTERM_CC_DI<br>RECT | GO:0005739~mitochondrion                             | 14    | 1,40E-06    |
| KEGG_PATHWAY         | ecb00190:Oxidative phosphorylation                   | 13    | 1,69E-12    |
| KEGG_PATHWAY         | ecb05012:Parkinson's disease                         | 13    | 3,57E-12    |
| GOTERM_CC_DI<br>RECT | GO:0070062~extracellular exosome                     | 13    | 0,047249394 |
| UP_KEYWORDS          | Chromosome                                           | 10    | 4,30E-12    |
| UP_KEYWORDS          | Mitochondrion                                        | 10    | 1,63E-10    |
| UP_KEYWORDS          | DNA-binding                                          | 10    | 2,09E-05    |
| UP_KEYWORDS          | Transport                                            | 10    | 3,60E-05    |
| UP_KEYWORDS          | Nucleus                                              | 10    | 6,21E-04    |
| UP_KEYWORDS          | Respiratory chain                                    | 9     | 7,16E-16    |
| UP_KEYWORDS          | Electron transport                                   | 9     | 3,97E-14    |
| UP_KEYWORDS          | Nucleosome core                                      | 9     | 2,19E-11    |
| INTERPRO             | IPR009072:Histone-fold                               | 9     | 2,07E-10    |
| UP_KEYWORDS          | Ubiquinone                                           | 8     | 3,96E-16    |
| GOTERM_MF_D<br>IRECT | GO:0008137~NADH dehydrogenase (ubiquinone) activity  | 8     | 3,09E-12    |
| GOTERM_CC_DI<br>RECT | GO:0005747~mitochondrial respiratory chain complex I | 8     | 6,67E-11    |
| GOTERM_MF_D<br>IRECT | GO:0003677~DNA binding                               | 8     | 5,87E-04    |
| UP_SEQ_FEATU<br>RE   | transmembrane region                                 | 8     | 9,18E-04    |
| GOTERM_CC_DI<br>RECT | GO:0000786~nucleosome                                | 7     | 1,55E-08    |
| UP_KEYWORDS          | NAD                                                  | 7     | 5,92E-08    |
| KEGG_PATHWAY         | ecb05322:Systemic lupus erythematosus                | 7     | 3,03E-05    |

|                      |                                                                    |   |             |
|----------------------|--------------------------------------------------------------------|---|-------------|
| UP_KEYWORDS          | Oxidoreductase                                                     | 7 | 4,97E-05    |
| KEGG_PATHWAY         |                                                                    |   |             |
| Y                    | ecb05034:Alcoholism                                                | 7 | 2,10E-04    |
| GOTERM_CC_DI<br>RECT | GO:0016020~membrane                                                | 7 | 0,047593153 |
| UP_KEYWORDS          | Mitochondrion inner membrane                                       | 6 | 2,81E-07    |
| KEGG_PATHWAY         |                                                                    |   |             |
| Y                    | ecb05010:Alzheimer's disease                                       | 6 | 0,001939005 |
| KEGG_PATHWAY         |                                                                    |   |             |
| Y                    | ecb05016:Huntington's disease                                      | 6 | 0,003145256 |
| GOTERM_BP_DI<br>RECT | GO:0006335~DNA replication-<br>dependent nucleosome assembly       | 5 | 4,77E-07    |
| GOTERM_BP_DI<br>RECT | GO:0051290~protein<br>heterotetramerization                        | 5 | 5,76E-07    |
| INTERPRO             | IPR007125:Histone core                                             | 5 | 2,52E-05    |
| GOTERM_CC_DI<br>RECT | GO:0000784~nuclear chromosome,<br>telomeric region                 | 5 | 2,30E-04    |
| GOTERM_CC_DI<br>RECT | GO:0005743~mitochondrial inner<br>membrane                         | 5 | 0,001683893 |
| SMART                | SM00417:H4                                                         | 4 | 6,25E-07    |
| SMART                | SM00803:TAF                                                        | 4 | 1,22E-06    |
| GOTERM_CC_DI<br>RECT | GO:0070469~respiratory chain                                       | 4 | 2,03E-06    |
| INTERPRO             | IPR019809:Histone H4, conserved site                               | 4 | 2,80E-06    |
| INTERPRO             | IPR001951:Histone H4                                               | 4 | 2,80E-06    |
| GOTERM_BP_DI<br>RECT | GO:0045653~negative regulation of<br>megakaryocyte differentiation | 4 | 4,00E-06    |
| INTERPRO             | IPR004823:TATA box binding protein<br>associated factor (TAF)      | 4 | 5,47E-06    |
| GOTERM_BP_DI<br>RECT | GO:0006336~DNA replication-<br>independent nucleosome assembly     | 4 | 1,95E-05    |
| GOTERM_BP_DI<br>RECT | GO:0006352~DNA-templated<br>transcription, initiation              | 4 | 2,71E-05    |
| INTERPRO             | IPR020904:Short-chain<br>dehydrogenase/reductase, conserved site   | 4 | 1,57E-04    |
| INTERPRO             | IPR002347:Glucose/ribitol<br>dehydrogenase                         | 4 | 6,29E-04    |
| GOTERM_BP_DI<br>RECT | GO:0006334~nucleosome assembly                                     | 4 | 8,65E-04    |
| GOTERM_MF_D<br>IRECT | GO:0016491~oxidoreductase activity                                 | 4 | 0,001585835 |
| INTERPRO             | IPR016040:NAD(P)-binding domain                                    | 4 | 0,016019866 |
| KEGG_PATHWAY         |                                                                    |   |             |
| Y                    | ecb04932:Non-alcoholic fatty liver<br>disease (NAFLD)              | 4 | 0,045179763 |
| INTERPRO             | IPR001750:NADH:ubiquinone/plastoqui<br>none oxidoreductase         | 3 | 3,19E-05    |
| GOTERM_BP_DI<br>RECT | GO:0042773~ATP synthesis coupled<br>electron transport             | 3 | 5,21E-05    |
| GOTERM_CC_DI         | GO:0000788~nuclear nucleosome                                      | 3 | 0,004620686 |



|              |                              |   |             |
|--------------|------------------------------|---|-------------|
| RECT         |                              |   |             |
| KEGG_PATHWA  |                              |   |             |
| Y            | ecb04978:Mineral absorption  | 3 | 0,022822957 |
| GOTERM_CC_DI |                              |   |             |
| RECT         | GO:0000790~nuclear chromatin | 3 | 0,073903618 |

685

686

687

688

689

690

691

692

693

694

695

696

697

698

699

700

701

702

703

704

705

706

707

708

709

710

711

712

713

714

715

716

717

718

719

720 FIGURE LEGENDS.

721

722

723

724 **Figure 1.** Vulcano plot showing TPM comparison between fresh and frozen tissue at 12  
725 days. Each point represents a gene, characterized in the X-axis as its TPM value in the  
726 fresh tissue and in the Y-axis as its TPM value in the frozen tissue. Circled genes  
727 represent differentially expressed genes in the two conditions.

728

729 **Figure 2.** Selected enriched GO terms differentially regulated in equine embryos  
730 obtained with fresh and frozen thawed sperm

731

732

733

734 **Figure 3.** Enriched Kyoto Encyclopedia of genes and genomes (KEEG) pathways in  
735 transcripts downregulated in 8 (A) 10 (B) and 12 (C) days embryos obtained with  
736 frozen thawed spermatozoa

737

738 **Figure 4.** Functional networks (STRING) of transcripts downregulated in 8 days equine  
739 embryos obtained with frozen thawed sperm. Functional networks apply to Histones  
740 and mitochondrial proteins. Controls are same age embryos from the same mare and  
741 stallion obtained with fresh semen

742

743 **Figure 5.** Functional networks (STRING) of transcripts downregulated in 10 days  
744 equine embryos obtained with frozen thawed sperm. Functional networks apply to  
745 Histones and mitochondrial proteins. Controls are same age embryos from the same  
746 mare and stallion obtained with fresh semen

747

748

749 **Figure 6.** Functional networks (STRING) of transcripts downregulated in 12 days  
750 equine embryos obtained with frozen thawed sperm. Functional networks apply to

751 Histones and mitochondrial proteins Controls are same age embryos from the same  
752 mare and stallion obtained with fresh semen  
753  
754

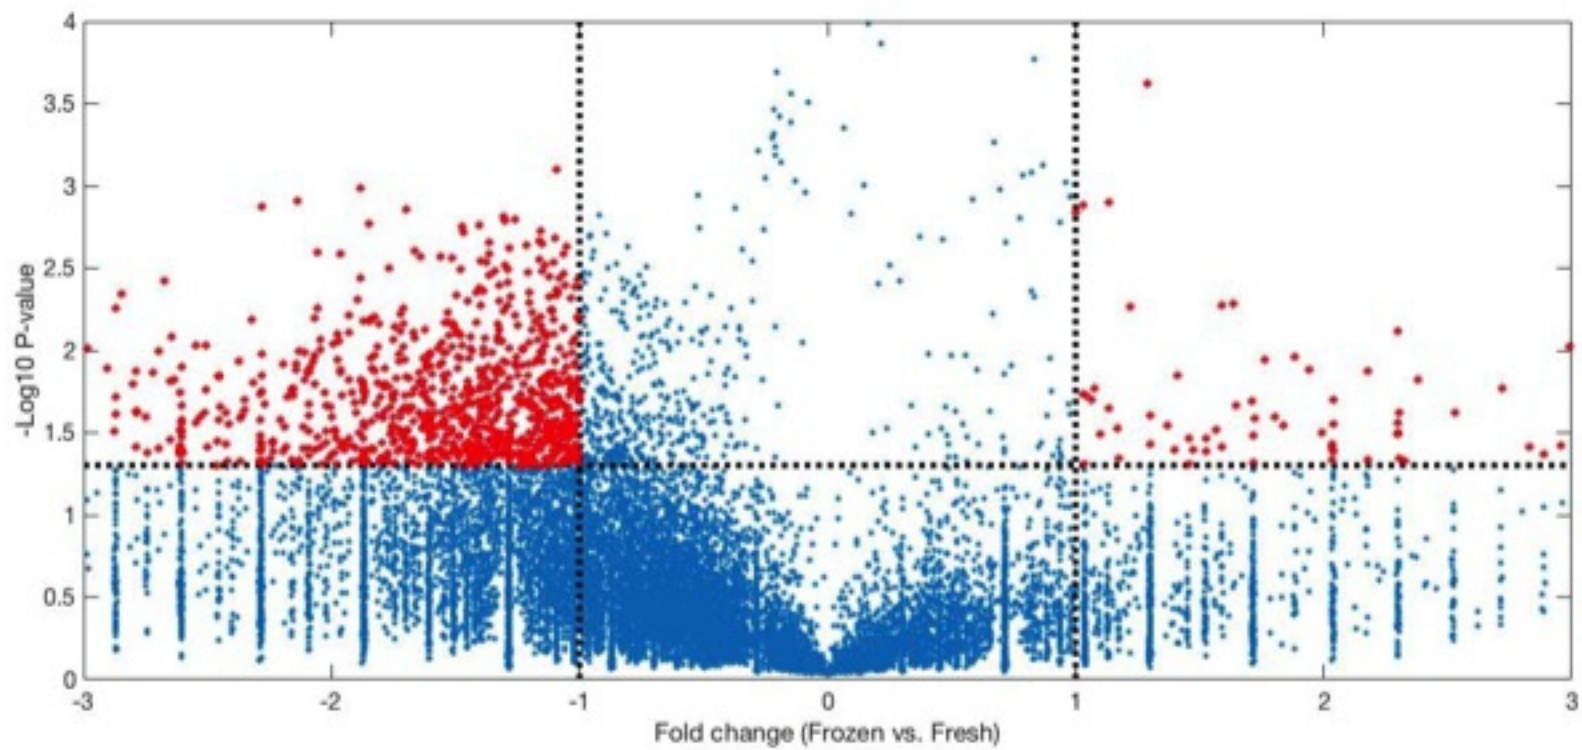

Figure 1

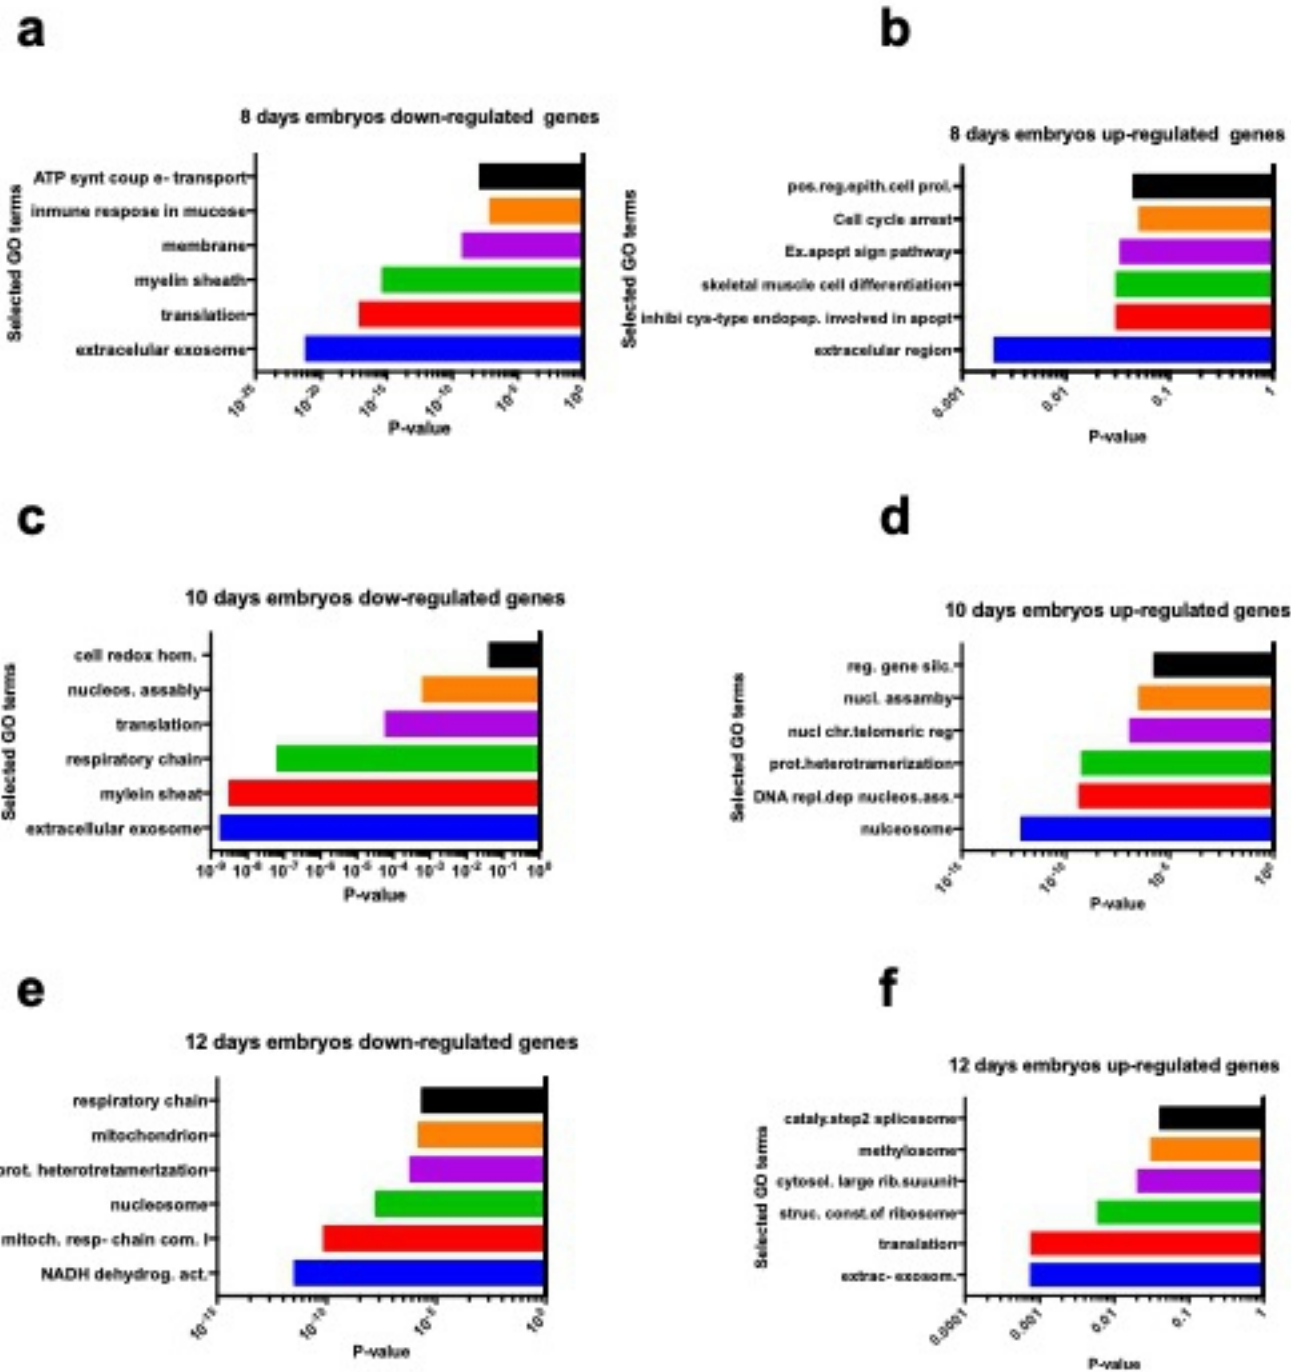

Figure 2

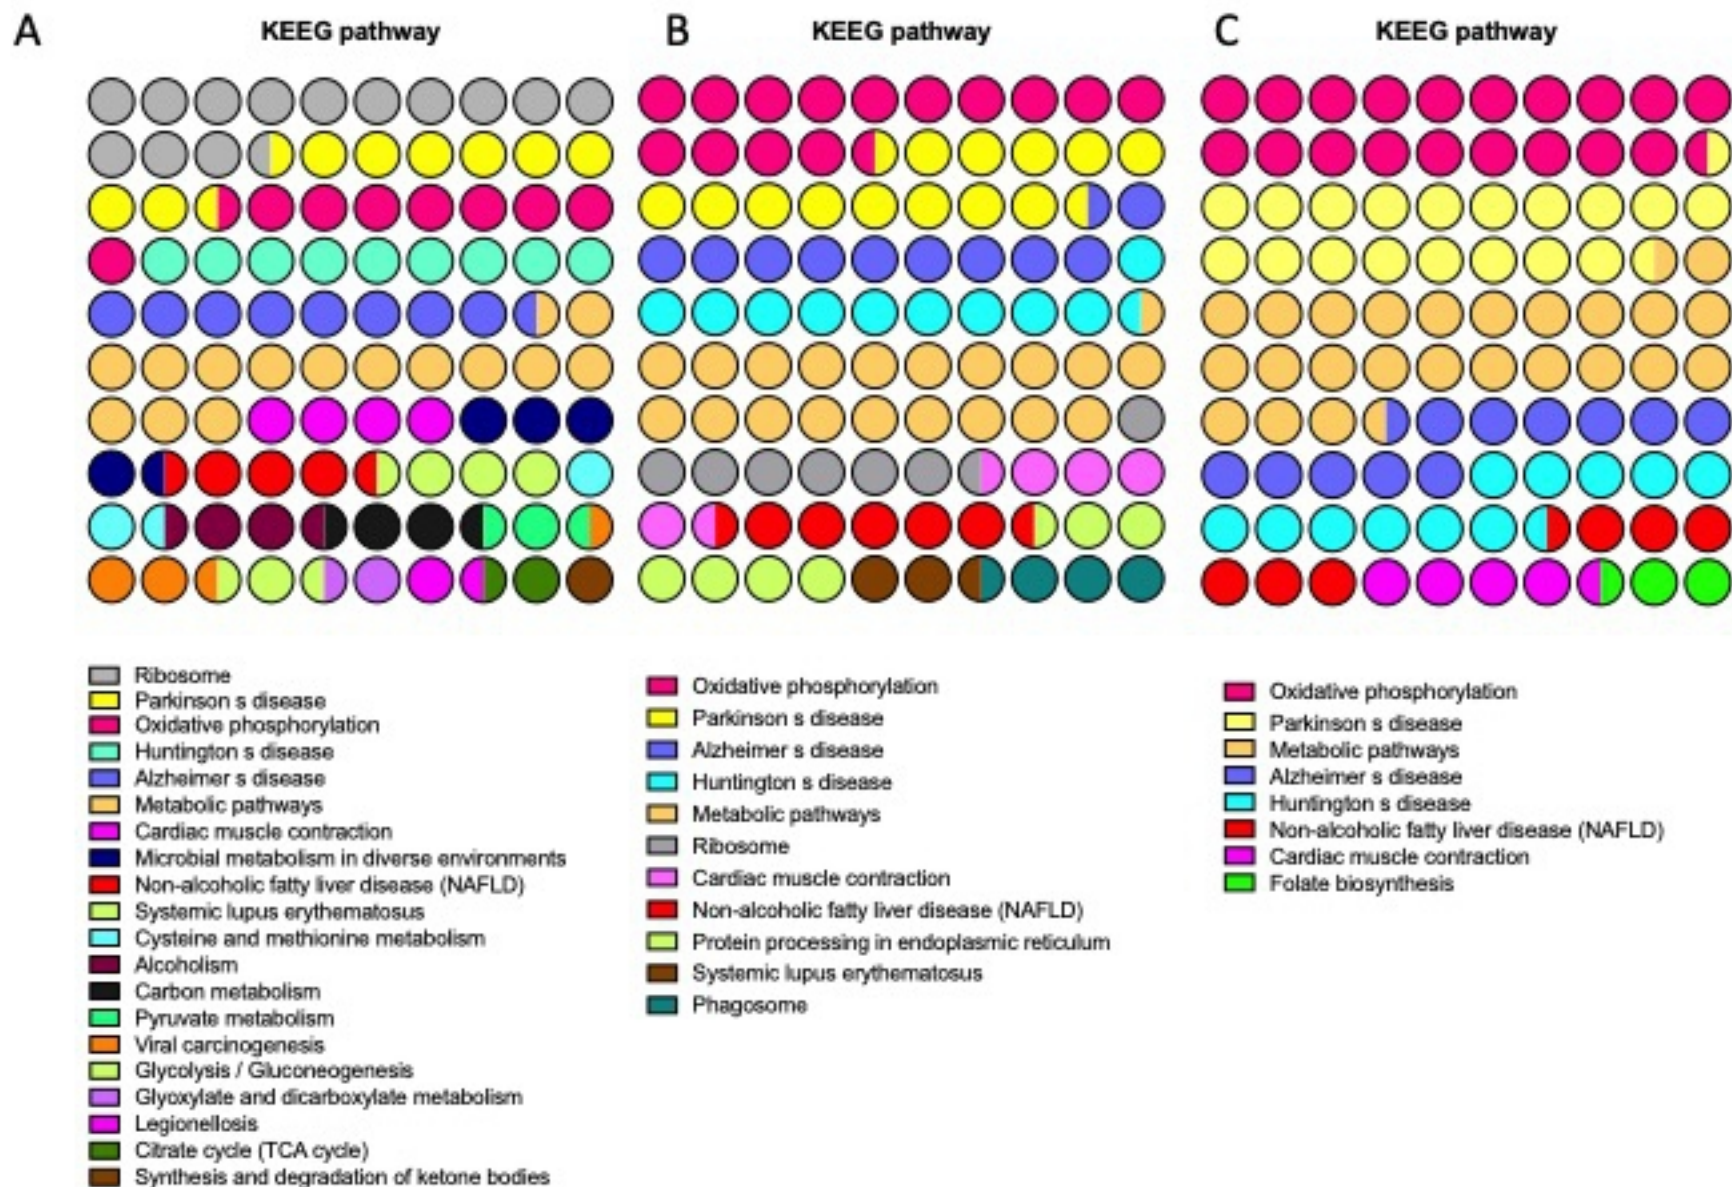

Figure 3



Fig 3 Downregulated  
10 días

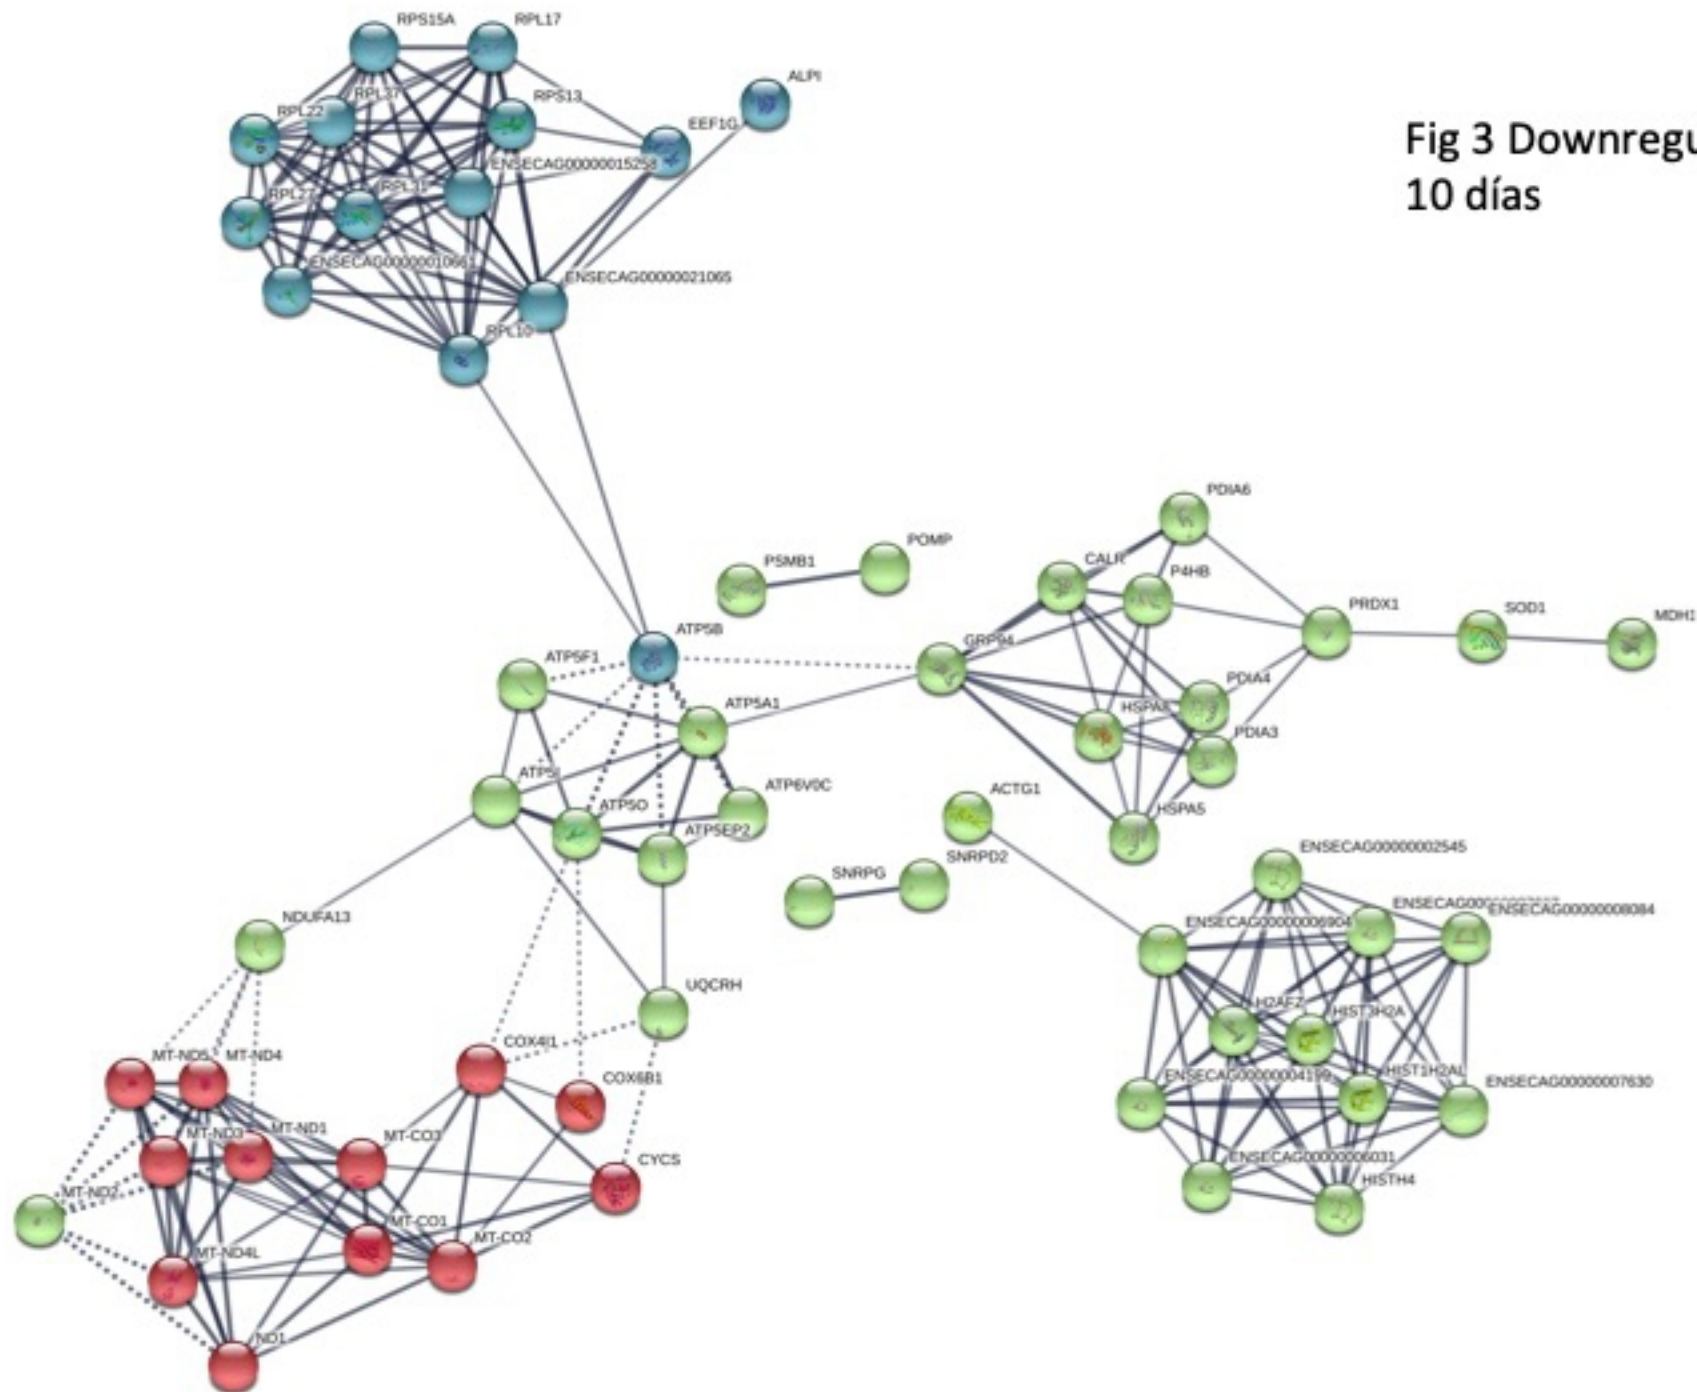

Figure 5
